# Supplementary material
Source: PubMed Central journal article supplement (PMC6942205)
Supplement: NIHMS1541250-supplement-1.pdf [file NIHMS1541250-supplement-1.pdf]

## SUPPLEMENTAL INFORMATION

### **A TFAP2C Gene Signature is Predictive of Outcome in HER2-positive Breast Cancer**

Vincent T. Wu<sup>1,8</sup>, Boris Kiriazov<sup>1,8</sup>, Kelsey E. Koch<sup>1</sup>, Vivian W. Gu<sup>2</sup>, Anna C. Beck<sup>1</sup>, Nicholas Borcharding<sup>3</sup>, Tiandao Li<sup>1</sup>, Peter Addo<sup>1</sup>, Zachary J. Wehrspan<sup>4</sup>, Weizhou Zhang<sup>5</sup>, Terry A. Braun<sup>6</sup>, Bartley J. Brown<sup>6</sup>, Vimla Band<sup>7</sup>, Hamid Band<sup>7</sup>, Mikhail V. Kulak<sup>1</sup>, Ronald J. Weigel<sup>1,2,4\*</sup>

<sup>1</sup>Department of Surgery, University of Iowa, Iowa City, IA, 52242 USA

<sup>2</sup>Department of Molecular Physiology and Biophysics, University of Iowa, Iowa City, IA, 52242 USA

<sup>3</sup>Department of Pathology, University of Iowa, Iowa City, IA, 52242 USA

<sup>4</sup>Department of Biochemistry, University of Iowa, Iowa City, IA, 52242 USA

<sup>5</sup>Department of Pathology, Immunology, and Laboratory Medicine, University of Florida, Gainesville, FL 32610 USA

<sup>6</sup>Department of Biomedical Engineering, University of Iowa, Iowa City, IA, 52242 USA

<sup>7</sup>Department of Genetics, Cell Biology and Anatomy, University of Nebraska Medical Center, Omaha, NE, 68198 USA

<sup>8</sup>These authors contributed equally

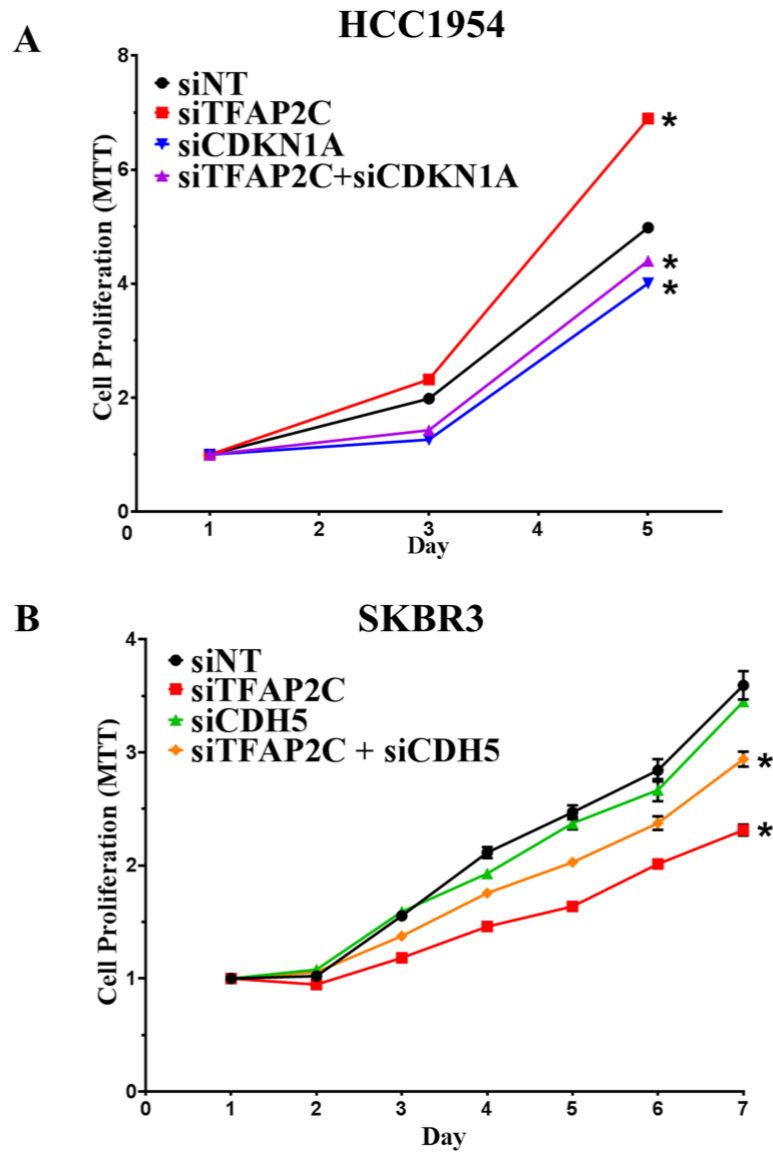

**Figure S1. Proliferative Response to CDKN1A and CDH5 with Knockdown of TFAP2C.** **A.** HCC1954 cells with knockdown of *TFAP2C*, *CDKN1A* or both showing proliferation determined by cell viability measured by MTT assay; these data were performed in parallel with data presented in Figure 5. **B.** Parallel experiments in SKBR3 cells with knockdown of *TFAP2C*, *CDH5* or both showing proliferation determined by cell viability measured by MTT assay; these data were performed in parallel with data presented in Figure 5.

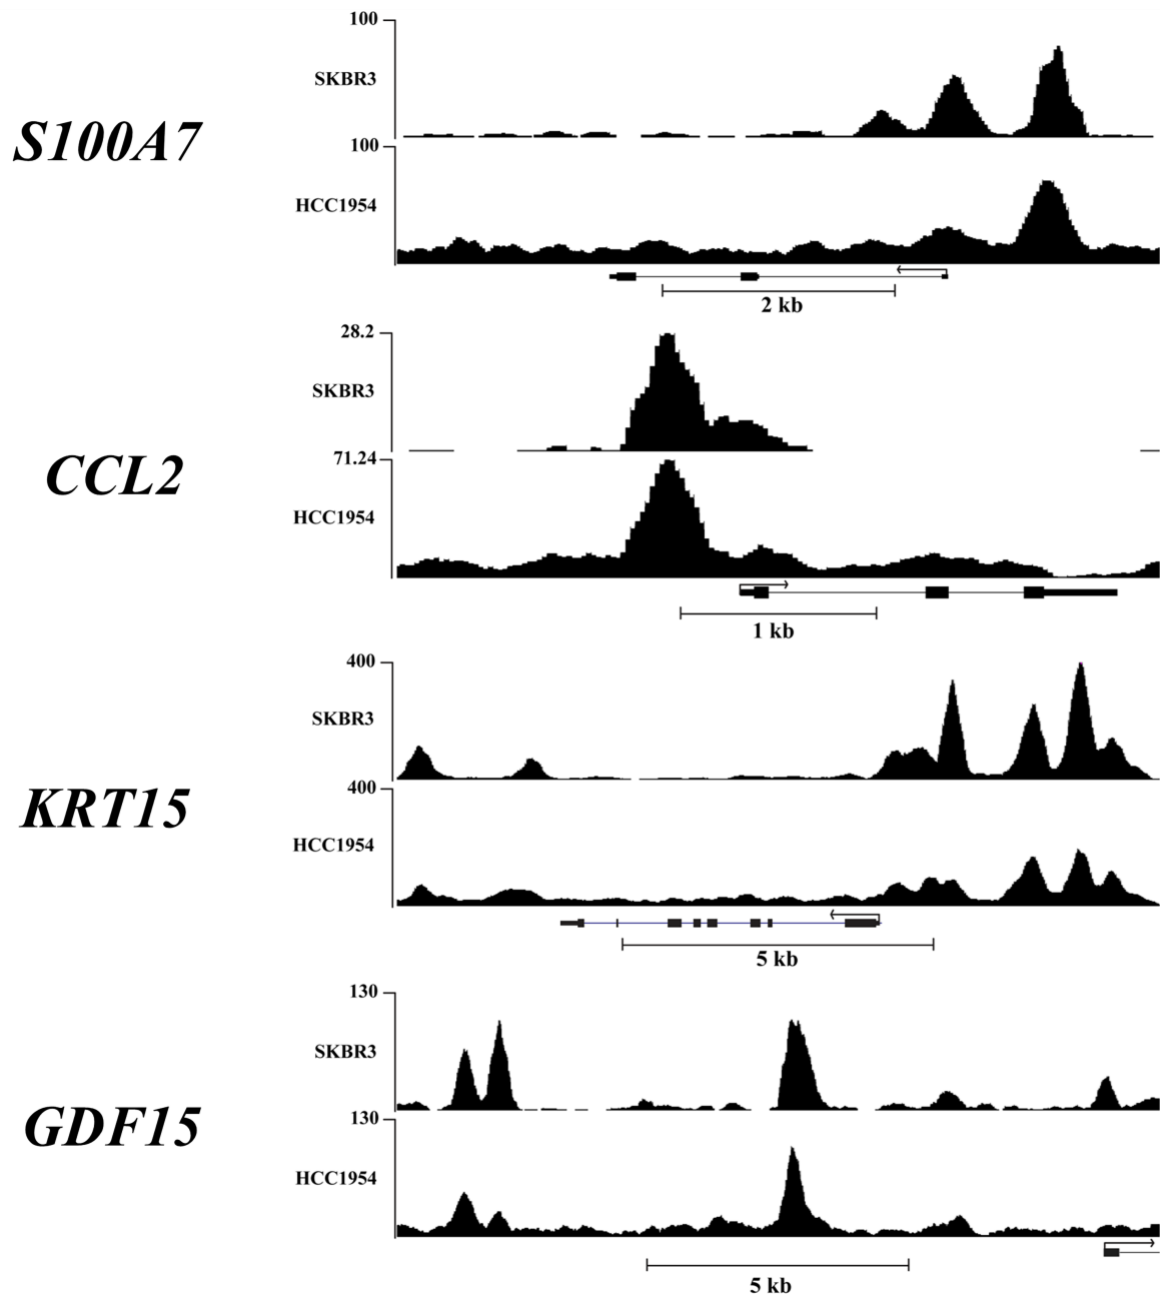

**Figure S2. ChIP-seq for Similarly Regulated Genes.** Examples of the regulatory regions of four genes of showing AP-2 $\gamma$  occupancy for SKBR3 and HCC1954 cells.

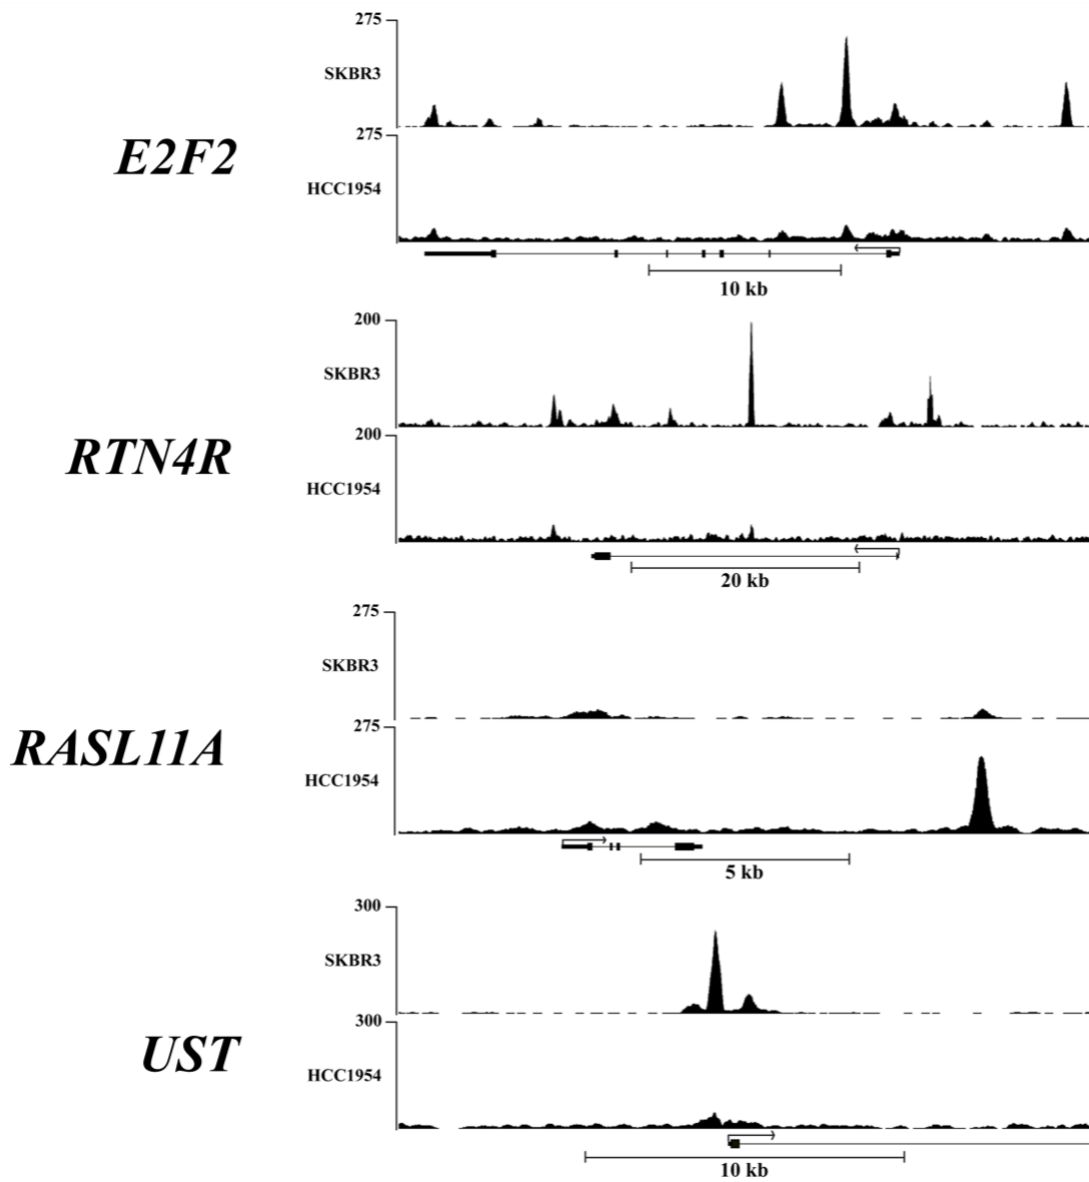

**Figure S3. ChIP-seq for Differentially Regulated Genes Demonstrating Differential AP-2 $\gamma$  Occupancy.** Shown are examples of ChIP-seq data for four genes demonstrating differences in AP-2 $\gamma$  occupancy comparing SKBR3 and HCC1954.

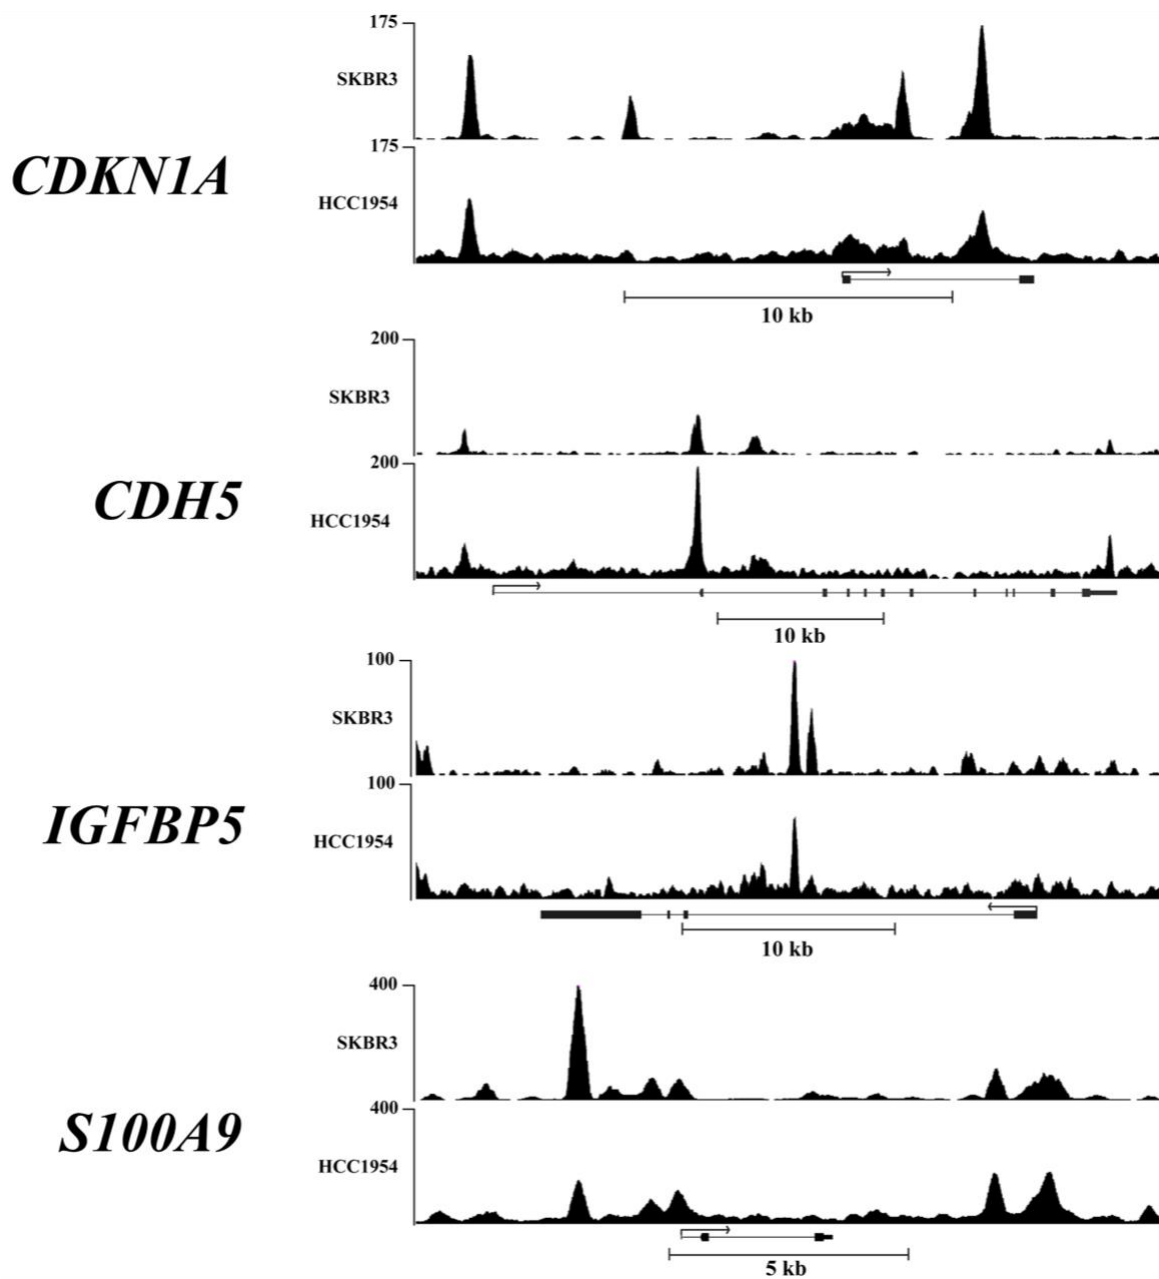

**Figure S4. ChIP-seq for Differentially Regulated Genes Demonstrating Similar AP-2 $\gamma$  Occupancy.** Shown are examples of ChIP-seq data for four genes demonstrating similar patterns of AP-2 $\gamma$  occupancy.

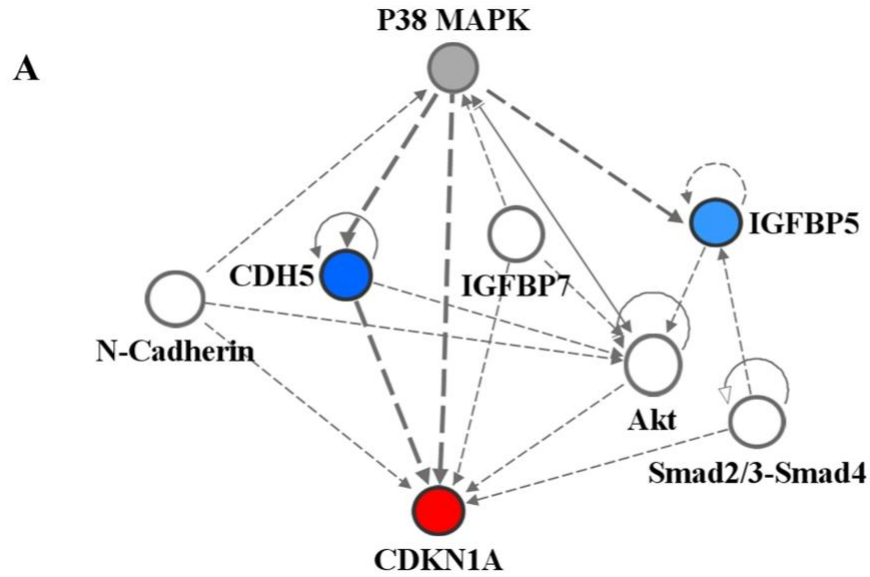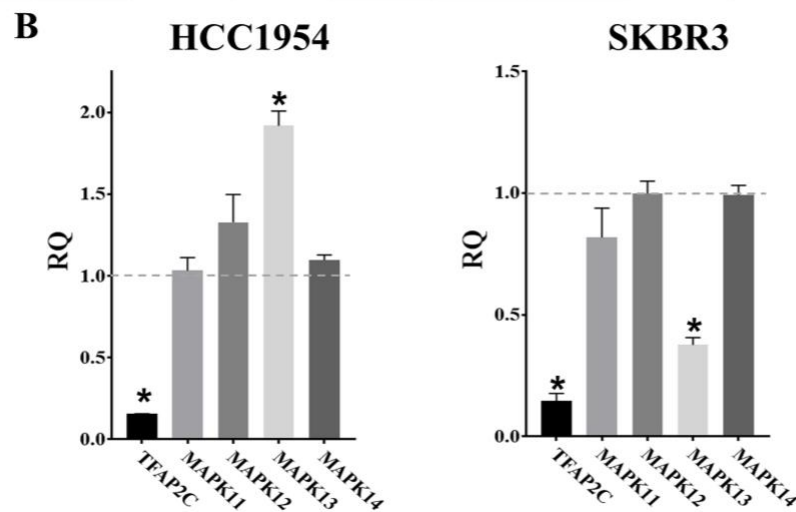

**Figure S5. Pathway Analysis Implicates MAPK13/p38.**

**A.** Pathway analysis shows the potential role of MAPK in regulation of differentially regulated genes in HER2 cancer lines. Relative color corresponds to change in relative expression and matches data in Figure 3. Data were analyzed through the use of Ingenuity Pathways Analysis. **B.** HCC1954 and SKBR3 cells were transfected with siRNA against *TFAP2C* vs. *NT* and relative RNA was measured using RT-PCR; data was normalized to transfection with *NT*; expression with *NT* was 1.0 (gray dotted line). Data demonstrate successful knockdown of *TFAP2C* and also significant changes in *MAPK13*; \* $p < 0.05$ .

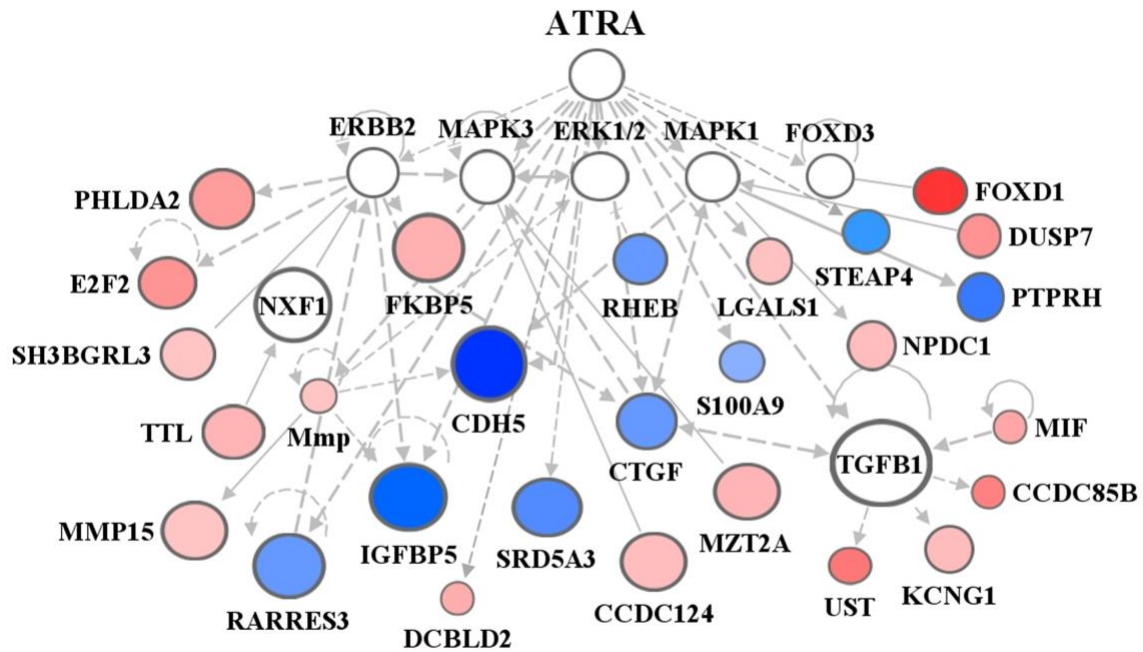

**Figure S6. Pathway Analysis Implicates All-trans Retinoic Acid.**

Pathway analysis shows the potential role of the retinoic acid pathway in regulating expression of differentially regulated gene signature. Relative color corresponds to change in relative expression and matches data in Figure 3. Data were analyzed through the use of Ingenuity Pathways Analysis.

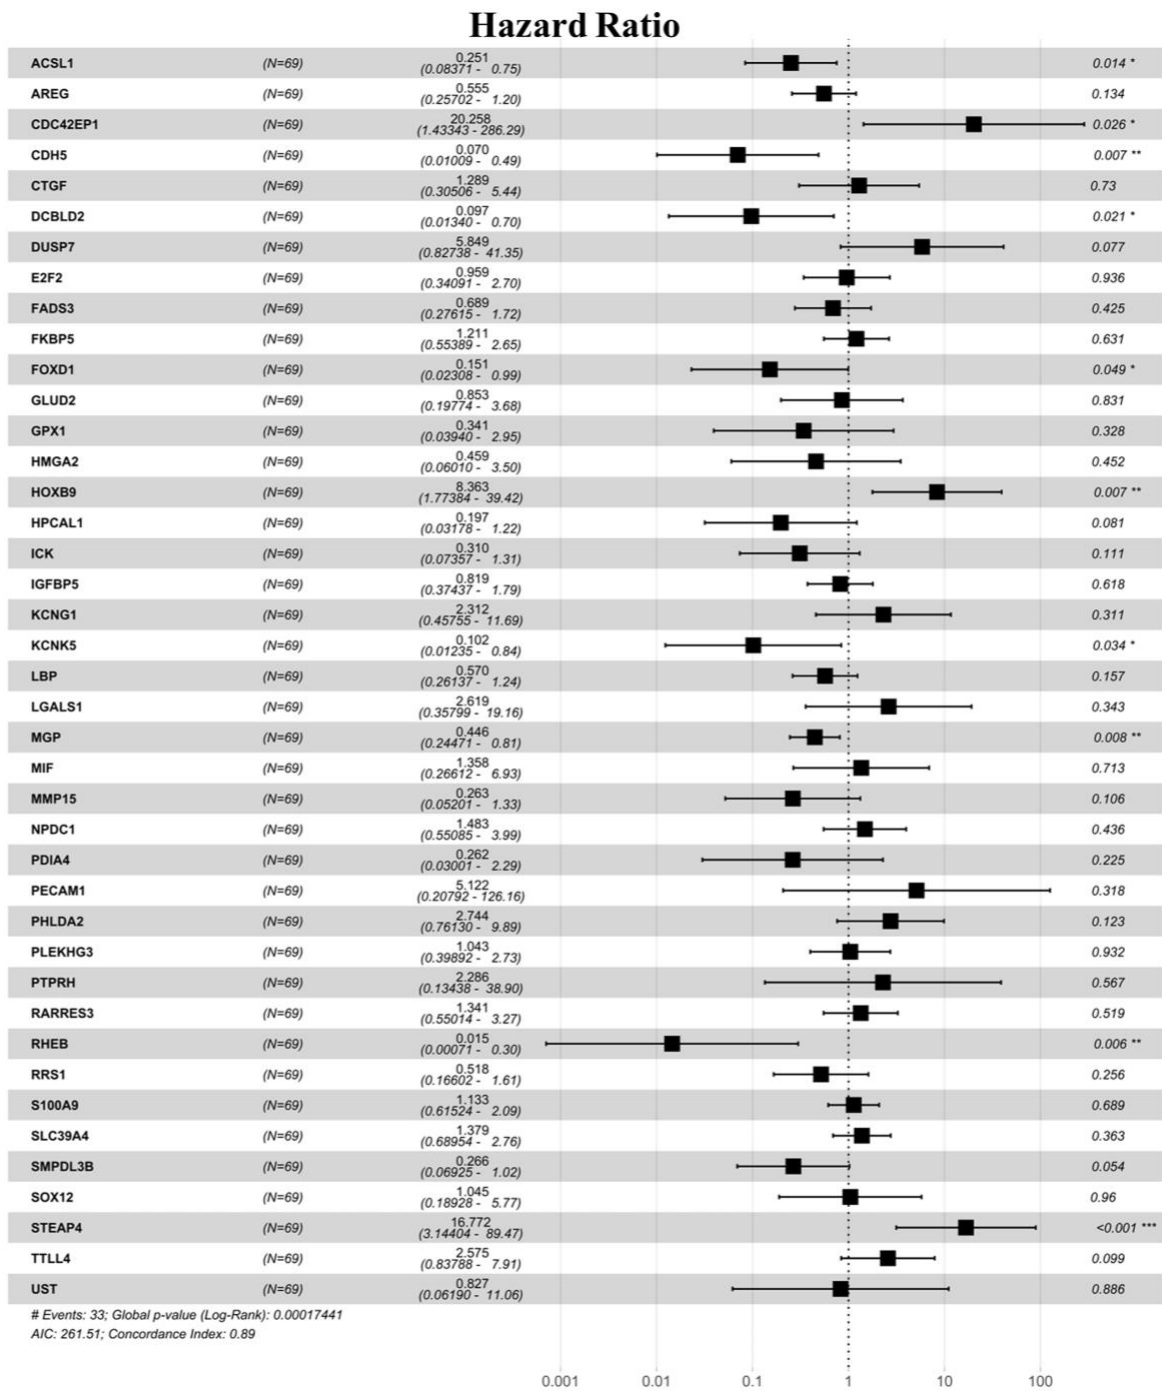

**Figure S7. Hazard Ratio for Expression of Differentially Regulated Genes.** Hazard Ratio is shown with confidence interval for 41 genes in Yau et al. (Yau et al., 2010) dataset. The p-values are shown in last column with significant differences noted by an asterisk.



**Table S1: Calculation of Recurrence Score (41-gene panel).**

| Gene     | coef     | exp(coef) | se(coef) | z      | Pr(> z ) |     |
|----------|----------|-----------|----------|--------|----------|-----|
| ACSL1    | -1.38176 | 0.25114   | 0.56053  | -2.465 | 0.013698 | *   |
| AREG     | -0.58843 | 0.5552    | 0.39295  | -1.497 | 0.134274 |     |
| CDC42EP1 | 3.00853  | 20.25762  | 1.35128  | 2.226  | 0.025985 | *   |
| CDH5     | -2.65749 | 0.07012   | 0.98926  | -2.686 | 0.007224 | **  |
| CTGF     | 0.25367  | 1.28875   | 0.73518  | 0.345  | 0.730059 |     |
| DCBLD2   | -2.33267 | 0.09704   | 1.01021  | -2.309 | 0.020939 | *   |
| DUSP7    | 1.76634  | 5.84939   | 0.99789  | 1.77   | 0.076715 | .   |
| E2F2     | -0.04216 | 0.95872   | 0.52756  | -0.08  | 0.936312 |     |
| FADS3    | -0.37209 | 0.68929   | 0.46669  | -0.797 | 0.42528  |     |
| FKBP5    | 0.19173  | 1.21134   | 0.39925  | 0.48   | 0.631078 |     |
| FOXD1    | -1.8873  | 0.15148   | 0.96002  | -1.966 | 0.04931  | *   |
| GLUD2    | -0.15893 | 0.85306   | 0.74587  | -0.213 | 0.831266 |     |
| GPX1     | -1.07624 | 0.34087   | 1.10091  | -0.978 | 0.328273 |     |
| HMGA2    | -0.77915 | 0.4588    | 1.03707  | -0.751 | 0.452473 |     |
| HOXB9    | 2.12377  | 8.36257   | 0.79115  | 2.684  | 0.007266 | **  |
| HPCAL1   | -1.62459 | 0.19699   | 0.93088  | -1.745 | 0.080945 | .   |
| ICK      | -1.17035 | 0.31026   | 0.7343   | -1.594 | 0.110974 |     |
| IGFBP5   | -0.19944 | 0.81919   | 0.39954  | -0.499 | 0.617659 |     |
| KCNQ1    | 0.83829  | 2.31242   | 0.82663  | 1.014  | 0.310528 |     |
| KCNK5    | -2.28431 | 0.10184   | 1.07652  | -2.122 | 0.033843 | *   |
| LBP      | -0.56253 | 0.56977   | 0.39761  | -1.415 | 0.157138 |     |
| LGALS1   | 0.96282  | 2.61908   | 1.01536  | 0.948  | 0.343001 |     |
| MGP      | -0.80773 | 0.44587   | 0.30611  | -2.639 | 0.008322 | **  |
| MIF      | 0.30578  | 1.35769   | 0.83144  | 0.368  | 0.713039 |     |
| MMP15    | -1.33639 | 0.26279   | 0.82652  | -1.617 | 0.105902 |     |
| NPDC1    | 0.39397  | 1.48285   | 0.50524  | 0.78   | 0.435533 |     |
| PDIA4    | -1.33988 | 0.26188   | 1.10537  | -1.212 | 0.225453 |     |
| PECAM1   | 1.63346  | 5.12156   | 1.63476  | 0.999  | 0.317696 |     |
| PHLDA2   | 1.00954  | 2.74434   | 0.65423  | 1.543  | 0.122807 |     |
| PLEKHG3  | 0.04211  | 1.04301   | 0.49037  | 0.086  | 0.931567 |     |
| PTPRH    | 0.82698  | 2.28641   | 1.44599  | 0.572  | 0.56738  |     |
| RARRES3  | 0.29317  | 1.34067   | 0.45447  | 0.645  | 0.518881 |     |
| RHEB     | -4.23282 | 0.01451   | 1.5428   | -2.744 | 0.006077 | **  |
| RRS1     | -0.65848 | 0.51764   | 0.58019  | -1.135 | 0.256401 |     |
| S100A9   | 0.12475  | 1.13286   | 0.31148  | 0.4    | 0.688791 |     |
| SLC39A4  | 0.32158  | 1.37931   | 0.35374  | 0.909  | 0.363294 |     |
| SMPDL3B  | -1.32281 | 0.26639   | 0.68734  | -1.925 | 0.054286 | .   |
| SOX12    | 0.04393  | 1.04491   | 0.87168  | 0.05   | 0.959805 |     |
| STEAP4   | 2.81971  | 16.77191  | 0.8542   | 3.301  | 0.000963 | *** |
| TTLL4    | 0.94583  | 2.57494   | 0.57282  | 1.651  | 0.098702 | .   |
| UST      | -0.1894  | 0.82746   | 1.32286  | -0.143 | 0.886155 |     |

coef - the beta coefficient

exp(coef) - the hazard ratio

se(coef) - the standard error for beta coefficient

z - the wald statistic, calculated by dividing beta with its standard error

Pr - Pvalue corresponding to z statistics. If lower than 5% then null hypothesis of beta=0 can be rejected for 95% confidence level

\*p<0.05, \*\*p<0.01, \*\*\*p<0.001

$$RS = \sum_{k=1}^n E_k C_k$$

$RS$  = recurrence score, where  $n$  is the number of genes used,  $E_k$  is the observed expression value for gene  $k$ , and  $C_k$  is the Cox-regression coefficient for gene  $k$

**Table S2: Calculation of Recurrence Score (16-gene panel).**

| <b>Gene</b> | <b>coef</b> | <b>exp(coef)</b> | <b>se(coef)</b> | <b>z</b> | <b>Pr(&gt; z )</b> |    |
|-------------|-------------|------------------|-----------------|----------|--------------------|----|
| ACSL1       | -0.98495    | 0.37346          | 0.73434         | -1.341   | 0.17983            |    |
| CDC42EP1    | 1.12295     | 3.07392          | 0.90493         | 1.241    | 0.21463            |    |
| DCBLD2      | -0.23381    | 0.79152          | 0.60608         | -0.386   | 0.69967            |    |
| DUSP7       | 0.17424     | 1.19034          | 0.33437         | 0.521    | 0.60231            |    |
| FADS3       | 0.43487     | 1.54476          | 0.55792         | 0.779    | 0.43572            |    |
| GLUD2       | -0.21373    | 0.80756          | 0.46138         | -0.463   | 0.64319            |    |
| ICK         | -2.12797    | 0.11908          | 0.76997         | -2.764   | 0.00571            | ** |
| KCNQ1       | -1.9555     | 0.14149          | 0.66812         | -2.927   | 0.00342            | ** |
| MMP15       | 0.49272     | 1.63676          | 0.34161         | 1.442    | 0.1492             |    |
| NPDC1       | 0.19501     | 1.21533          | 0.30042         | 0.649    | 0.51625            |    |
| PHLDA2      | -0.585      | 0.55711          | 0.47832         | -1.223   | 0.22132            |    |
| RARRES3     | -0.45798    | 0.63256          | 0.32929         | -1.391   | 0.16428            |    |
| S100A9      | 0.03405     | 1.03464          | 0.09974         | 0.341    | 0.73279            |    |
| SLC39A4     | -0.77984    | 0.45848          | 0.4964          | -1.571   | 0.11619            |    |
| SMPDL3B     | -0.31273    | 0.73144          | 0.29331         | -1.066   | 0.28633            |    |
| STEAP4      | 0.82779     | 2.28826          | 0.36423         | 2.273    | 0.02304            | *  |

coef - the beta coefficient

exp(coef) - the hazard ratio

se(coef) - the standard error for beta coefficient

z - the wald statistic, calculated by dividing beta with its standard error

Pr - Pvalue corresponding to z statistics. If lower than 5% then null hypothesis of beta=0 can be rejected for 95% confidence level

\*p<0.05, \*\*p<0.01
